# Supplementary material for: A scoring matrix approach to detecting miRNA target sites
Source: PubMed Central journal article supplement (PMC2365947; doi:10.1186/1748-7188-3-3), 2008-03-31
Supplement: 1748-7188-3-3-S1.pdf [file 1748-7188-3-3-S1.pdf]

| Target             | LOO score | ≥ LOO score | miRanda(s) | ≥ miRanda(s) | miRanda(e) | ≥ miRanda(e) | ≥ miRanda(se) |
|--------------------|-----------|-------------|------------|--------------|------------|--------------|---------------|
| ZK792.6/247-264    | 0.9587762 | 3561        | 109        | 83402        | -14.10     | 38347        | 19155         |
| F38A6.1a/271-288   | 1.0000000 | 1708        | 92         | 390274       | -10.15     | 273523       | 159046        |
| C18D1.1.1/526-542  | 0.9064860 | 10458       | 123        | 25838        | -11.21     | 170342       | 19261         |
| ZK792.6/666-683    | 0.9588374 | 3522        | 120        | 37964        | -14.88     | 24456        | 8034          |
| ZK792.6/458-475    | 0.9286717 | 7311        | 127        | 15875        | -13.18     | 63901        | 9280          |
| F38A6.1a/133-150   | 0.8742177 | 19177       | 108        | 95809        | -14.56     | 29677        | 16710         |
| C01G8.9a/21-38     | 0.8496634 | 23906       | 123        | 25838        | -15.23     | 19926        | 5901          |
| ZK792.6/132-148    | 0.8591035 | 20570       | 112        | 66769        | -12.00     | 117457       | 33464         |
| C01G8.9a/159-175   | 0.8134508 | 30895       | 113        | 61153        | -13.33     | 58770        | 21054         |
| ZK792.6/190-207    | 0.8068349 | 41812       | 91         | 403453       | -13.33     | 58770        | 46851         |
| C12C8.3a/693-709   | 0.7908144 | 39369       | 151        | 888          | -25.13     | 14           | 9             |
| C12C8.3a/742-757   | 1.0000000 | 1499        | 163        | 84           | -25.06     | 16           | 4             |
| ZK792.6/484-499    | 0.8981500 | 10232       | 107        | 102609       | -17.86     | 3488         | 2822          |
| F11A1.3a/1007-1021 | 0.9483082 | 4658        | 128        | 13871        | -17.91     | 3345         | 1340          |
| ZK792.6/343-361    | 0.9552215 | 4352        | 113        | 61153        | -13.94     | 41961        | 16950         |
| <b>Mean</b>        | 0.9032357 | 14869       | 119        | 92332        | -15.46     | 60266        | 23992         |

Table 1: Summary of the results for let-7 target predictions in *Caenorhabditis elegans*. Column “target” lists accession of the location of the validated target (UTR accession, start and end position), column “LOO score” shows the score for that target when left out of the *SBM*, column “≥ LOO score” shows the number of regions scoring equal to or greater than the left out sequence, column “miRanda(s)” shows the raw score of the miRanda hit corresponding to the target region, column “≥ miRanda(s)” shows the number of regions scoring equal to or greater than the target region, column “miRanda(e)” shows the minimum free energy (MFE) of the miRanda hit corresponding to the target region, column “≥ miRanda(e)” shows the number of regions with an equal or more stable MFE than the target region, column “≥ miRanda(se)” shows the number of regions with an equal or more stable MFE and a score greater than or equal to the target region.

| Target          | LOO score | ≥ LOO score | miRanda(s) | ≥ miRanda(s) | miRanda(e) | ≥ miRanda(e) | ≥ miRanda(se) |
|-----------------|-----------|-------------|------------|--------------|------------|--------------|---------------|
| ZK792.6/126-148 | 0.8042310 | 4970        | 103        | 149244       | -7.50      | 432158       | 114090        |
| ZK792.6/187-207 | 0.5515072 | 132626      | 84         | 612304       | -10.95     | 74633        | 61242         |
| ZK792.6/249-264 | 0.9471851 | 355         | 114        | 55099        | -10.61     | 91546        | 23993         |
| ZK792.6/342-361 | 0.7607794 | 12552       | 102        | 160281       | -8.80      | 235444       | 88454         |
| ZK792.6/460-475 | 0.8575555 | 2012        | 126        | 15024        | -10.20     | 114702       | 12066         |
| ZK792.6/479-499 | 0.7394901 | 18375       | 94         | 317848       | -12.08     | 38304        | 27872         |
| ZK792.6/665-683 | 0.7264934 | 15846       | 122        | 25051        | -11.22     | 64174        | 12052         |
| <b>Mean</b>     | 0.7696059 | 26677       | 106        | 190693       | -10.19     | 150137       | 48538         |

Table 2: Summary of the results for miR-84 target predictions in *Caenorhabditis elegans*. Column “target” lists accession of the location of the validated target (UTR accession, start and end position), column “LOO score” shows the score for that target when left out of the *SBM*, column “≥ LOO score” shows the number of regions scoring equal to or greater than the left out sequence, column “miRanda(s)” shows the raw score of the miRanda hit corresponding to the target region, column “≥ miRanda(s)” shows the number of regions scoring equal to or greater than the target region, column “miRanda(e)” shows the minimum free energy (MFE) of the miRanda hit corresponding to the target region, column “≥ miRanda(e)” shows the number of regions with an equal or more stable MFE than the target region, column “≥ miRanda(se)” shows the number of regions with an equal or more stable MFE and a score greater than or equal to the target region.

| Target             | LOO score | $\geq$ LOO score | miRanda(s) | $\geq$ miRanda(s) | miRanda(e) | $\geq$ miRanda(e) | $\geq$ miRanda(se) |
|--------------------|-----------|------------------|------------|-------------------|------------|-------------------|--------------------|
| CG12487.3/223-241  | 0.9464120 | 94               | 164        | 215               | -22.76     | 127               | 44                 |
| CG5185.3/279-297   | 1.0000000 | 34               | 173        | 36                | -24.25     | 45                | 10                 |
| CG3096.3/152-170   | 1.0000000 | 34               | 168        | 117               | -24.14     | 46                | 16                 |
| CG12487.3/250-268  | 1.0000000 | 34               | 179        | 8                 | -24.71     | 38                | 6                  |
| CG3166.3/1100-1118 | 0.9505960 | 76               | 140        | 3490              | -18.77     | 2322              | 621                |
| CG6096.3/103-121   | 1.0000000 | 34               | 172        | 47                | -23.80     | 63                | 12                 |
| CG8346.3/78-96     | 0.9659194 | 58               | 185        | 2                 | -28.03     | 2                 | 1                  |
| CG5185.3/334-352   | 1.0000000 | 34               | 170        | 83                | -23.24     | 93                | 25                 |
| CG6494.3/447-465   | 0.9188494 | 155              | 179        | 8                 | -25.24     | 25                | 3                  |
| CG6096.3/24-42     | 1.0000000 | 34               | 171        | 64                | -23.71     | 72                | 19                 |
| CG6096.3/68-86     | 0.9614793 | 65               | 170        | 83                | -23.71     | 72                | 21                 |
| CG8328.3/63-81     | 0.7726001 | 2015             | 145        | 2210              | -16.48     | 10689             | 1001               |
| CG3166.3/1586-1602 | 0.8547854 | 393              | 138        | 4162              | -16.44     | 10990             | 1630               |
| CG3166.3/29-46     | 0.8454907 | 513              | 130        | 11501             | -16.84     | 8407              | 2226               |
| CG3166.3/1294-1312 | 0.8607346 | 521              | 108        | 111001            | -13.26     | 75409             | 26300              |
| <b>Mean</b>        | 0.9384578 | 273              | 159        | 8868              | -21.69     | 7227              | 2129               |

Table 3: Summary of the results for mir-7 target predictions in *Drosophila melanogaster*. Column “target” lists accession of the location of the validated target (UTR accession, start and end position), column “LOO score” shows the score for that target when left out of the *SBM*, column “ $\geq$  LOO score” shows the number of regions scoring equal to or greater than the left out sequence, column “miRanda(s)” shows the raw score of the miRanda hit corresponding to the target region, column “ $\geq$  miRanda(s)” shows the number of regions scoring equal to or greater than the target region, column “miRanda(e)” shows the minimum free energy (MFE) of the miRanda hit corresponding to the target region, column “ $\geq$  miRanda(e)” shows the number of regions with an equal or more stable MFE than the target region, column “ $\geq$  miRanda(se)” shows the number of regions with an equal or more stable MFE and a score greater than or equal to the target region.

| Target            | LOO score | $\geq$ LOO score | miRanda(s) | $\geq$ miRanda(s) | miRanda(e) | $\geq$ miRanda(e) | $\geq$ miRanda(se) |
|-------------------|-----------|------------------|------------|-------------------|------------|-------------------|--------------------|
| CG6096.3/135-154  | 0.7550454 | 3118             | 143        | 735               | -11.44     | 26630             | 491                |
| CG8328.3/27-45    | 1.0000000 | 8                | 135        | 3154              | -8.69      | 128342            | 2427               |
| CG3096.3/33-52    | 0.9287263 | 161              | 130        | 6986              | -7.00      | 305330            | 5993               |
| CG3096.3/138-157  | 0.8767518 | 473              | 136        | 2730              | -7.30      | 264578            | 2638               |
| CG5185.3/46-65    | 0.9598055 | 64               | 139        | 1586              | -8.84      | 118531            | 1390               |
| CG12487.3/188-208 | 0.8200697 | 1298             | 112        | 56515             | -8.54      | 138880            | 18111              |
| CG12487.3/62-82   | 0.8714641 | 627              | 127        | 10317             | -10.03     | 61435             | 3372               |
| CG6096.3/210-230  | 0.9076755 | 207              | 128        | 9883              | -6.26      | 429349            | 8181               |
| <b>Mean</b>       | 0.8899422 | 745              | 131        | 11488             | -8.51      | 184134            | 5325               |

Table 4: Summary of the results for mir-4 target predictions in *Drosophila melanogaster*. Column “target” lists accession of the location of the validated target (UTR accession, start and end position), column “LOO score” shows the score for that target when left out of the *SBM*, column “ $\geq$  LOO score” shows the number of regions scoring equal to or greater than the left out sequence, column “miRanda(s)” shows the raw score of the miRanda hit corresponding to the target region, column “ $\geq$  miRanda(s)” shows the number of regions scoring equal to or greater than the target region, column “miRanda(e)” shows the minimum free energy (MFE) of the miRanda hit corresponding to the target region, column “ $\geq$  miRanda(e)” shows the number of regions with an equal or more stable MFE than the target region, column “ $\geq$  miRanda(se)” shows the number of regions with an equal or more stable MFE and a score greater than or equal to the target region.
