# Supplementary material for: A scoring matrix approach to detecting miRNA target sites
Source: PubMed Central journal article supplement (PMC2365947; doi:10.1186/1748-7188-3-3), 2008-03-31
Supplement: 1748-7188-3-3-S2.pdf [file 1748-7188-3-3-S2.pdf]

| <b>Organism</b>        | <b>miRNA</b>       | <b>SBM</b> | <b>miRanda</b> | <b>Overlap</b> |
|------------------------|--------------------|------------|----------------|----------------|
| <i>C. elegans</i>      | <i>cel-miR-273</i> | 2          | 661            | 0              |
| <i>C. elegans</i>      | <i>cel-let-7</i>   | 1708       | 210            | 33             |
| <i>C. elegans</i>      | <i>cel-miR-84</i>  | 123        | 33             | 0              |
| <i>D. melanogaster</i> | <i>dme-miR-11</i>  | 4          | 369            | 0              |
| <i>D. melanogaster</i> | <i>dme-miR-2</i>   | 4          | 755            | 2              |
| <i>D. melanogaster</i> | <i>dme-miR-4</i>   | 31         | 14             | 0              |
| <i>D. melanogaster</i> | <i>dme-miR-7</i>   | 43         | 373            | 17             |
| <i>M. musculus</i>     | <i>mmu-miR-124</i> | 3          | 4645           | 0              |
| <i>M. musculus</i>     | <i>mmu-miR-206</i> | 3          | 5811           | 1              |
| <i>H. sapiens</i>      | <i>hsa-miR-1</i>   | 3          | 171            | 0              |
| <i>H. sapiens</i>      | <i>hsa-miR-122</i> | 3          | 11228          | 2              |

Table 1: Number of targets predicted by *SBM* and miRanda and number of overlaps between the two methods column “miRNA” lists the miRBase accession of the miRNA tested, column “*SBM*” shows the number of targets predicted by *SBM* with default threshold (-t 1), column “miRanda” shows the number of targets predicted by miRanda using default settings (no parameters given), column “Overlap” shows the number of targets that were predicted by both methods.
